# Supplementary material for: Perfluoropentane/apatinib-encapsulated metal–organic framework nanoparticles enhanced the microwave ablation of hepatocellular carcinoma
Source: Royal Society of Chemistry journal article supplement (doi:10.1039/d2na00880g), 2023-01-01
Supplement: d2na00880g1.pdf [file d2na00880g1.pdf]

# Perfluoropentane/apatinib-encapsulated metal–organic framework nanoparticle enhanced the microwave ablation of hepatocellular carcinoma

Dongyun Zhang<sup>1†</sup>, Yixuan Zhang<sup>1†</sup>, Yanchun Luo<sup>1</sup>, Erpeng Qi<sup>1</sup>, Jie Yu<sup>1\*</sup>, Ping Liang<sup>1\*</sup>

<sup>1</sup> Department of Interventional Ultrasound, PLA Medical College & Fifth Medical Center of Chinese PLA General Hospital, Beijing, China.

<sup>†</sup>Dongyun Zhang and Yixuan Zhang contributed equally to this work.

\*Correspondence: [jiemi301@163.com](mailto:jiemi301@163.com) and [liangping301@hotmail.com](mailto:liangping301@hotmail.com).

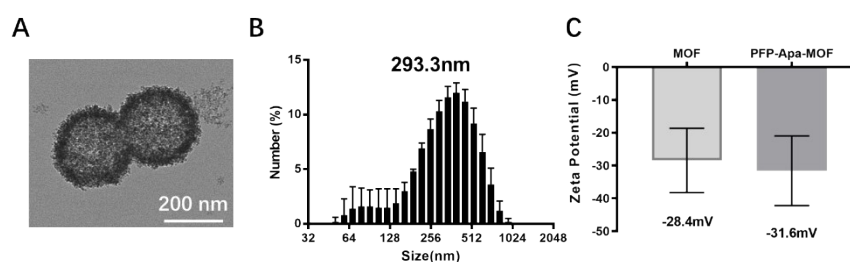

**Fig. S1.** Characterization of the iron-based MOF. (A) SEM of the MOF. (B) Particle number distribution of MOF. (C) The zeta potential of MOF and PFP-Apa-MOF.

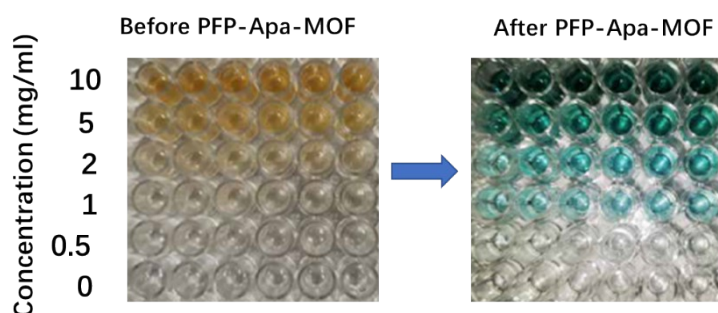

**Fig. S2.** Color of the TMB solution before and after addition of different concentration of PFP-Apa-MOF.

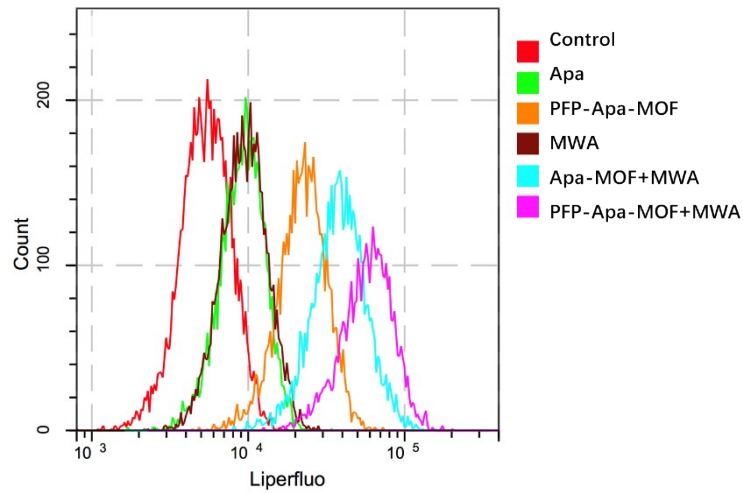

**Fig. S3.** Lipid peroxidation of different groups in Liperfluor staining with flow cytometry.

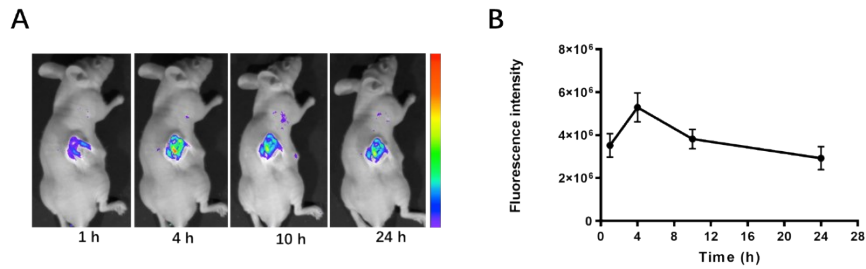

**Fig. S4.** (A) Fluorescence imaging images of mice at different time points after the injection of FITC labelled PFP-Apa-MOF. (B) Quantitative fluorescence analysis of mice at different time points

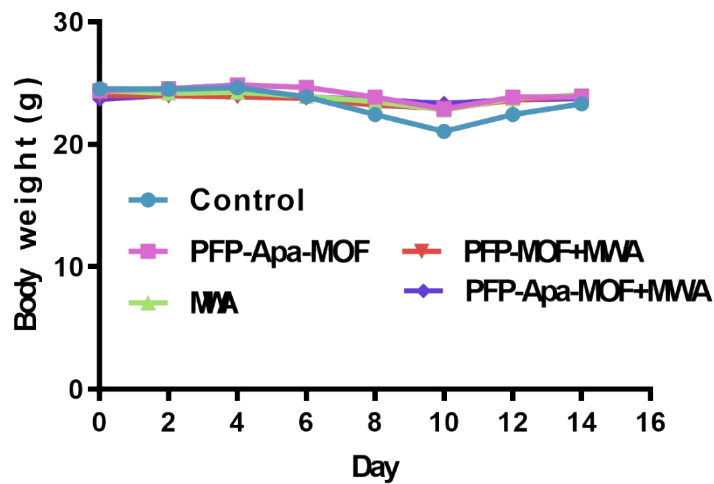

**Fig. S5.** Bodyweight change of mice curve for 14 days.

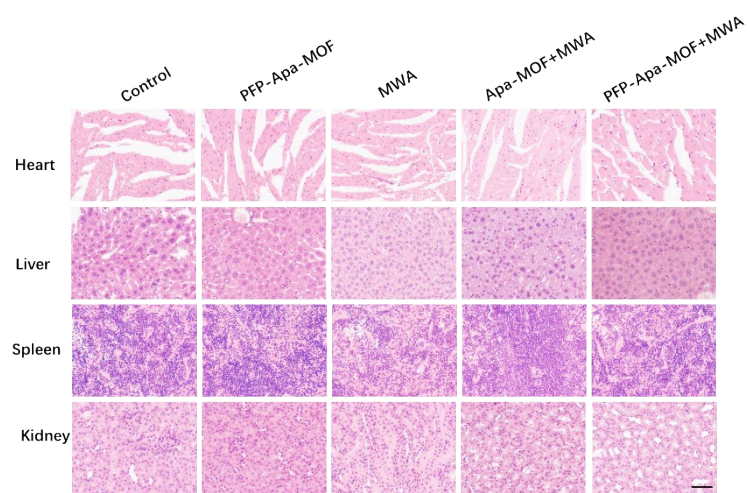

**Fig. S6.** HE staining of major mouse organs in five groups.
